# Supplementary material
Source: PubMed Central journal article supplement (PMC5203625)
Supplement: AEM.01955-16_zam999117605s1.pdf [file AEM.01955-16_zam999117605s1.pdf]

## **Supplementary material**

### **Quantitative metaproteomics highlight the metabolic contributions of uncultured phylotypes in a thermophilic anaerobic digester**

Live H. Hagen, Jeremy A. Frank, Mirzaman Zamanzadeh, Vincent G.H. Eijsink, Phillip B. Pope, Svein J. Horn\*, Magnus Ø. Arntzen

Department of Chemistry, Biotechnology and Food Science, Norwegian University of Life Sciences (NMBU), P. O. Box 5003, N-1432 Ås, Norway

\*Corresponding author. Department of Chemistry, Biotechnology and Food Science, Norwegian University of Life Sciences, P. O. Box 5003, N-1432 Ås, Norway. Tel.: + 47 67232488; Fax: + 47 64965901. E-mail address: svein.horn@nmbu.no

## Supplementary Figures

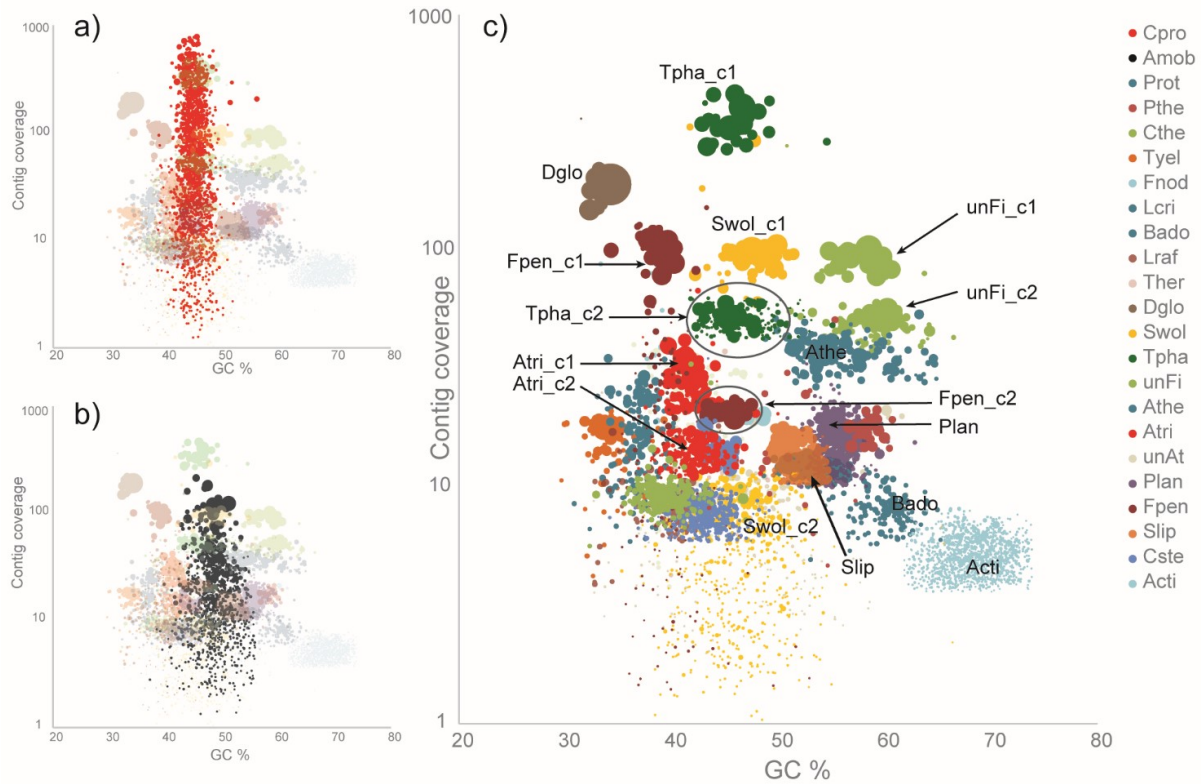

**Figure S1: Visualization of PhylopytiaS+/manually refined metagenome binning results.** Manual inspection and curation was based on visual clustering of metagenomics contigs in the GC% vs coverage plot, where the population bins are differentiated by color. Visual assessment of PhylopytiaS+-assigned contigs for *Coprothermobacter* spp. (**a**; highlighted in red) and *Anaerobaculum* spp. (**b**; highlighted in black) revealed no clustering based on coverage. These two bins were therefore grouped at a higher-ranked population level. The PhylopytiaS+/manual curation successfully recovered high quality reconstructed genomes for several populations, e.g. unFi\_c1 and unFi\_c2 (outlined, light green), Tpha\_c1 and Tpha\_c2 (outlined, dark green), Swol\_c1 (outlined, yellow), Atri\_c1 and Atri\_c2 (outlined, red). For the purposes of clarity, only contigs greater than 5 kb are represented for *Coprothermobacter* spp. (**a**) and *Anaerobaculum* spp. (**b**). Contigs greater 1 kb are represented for the remaining population bins (**c**).

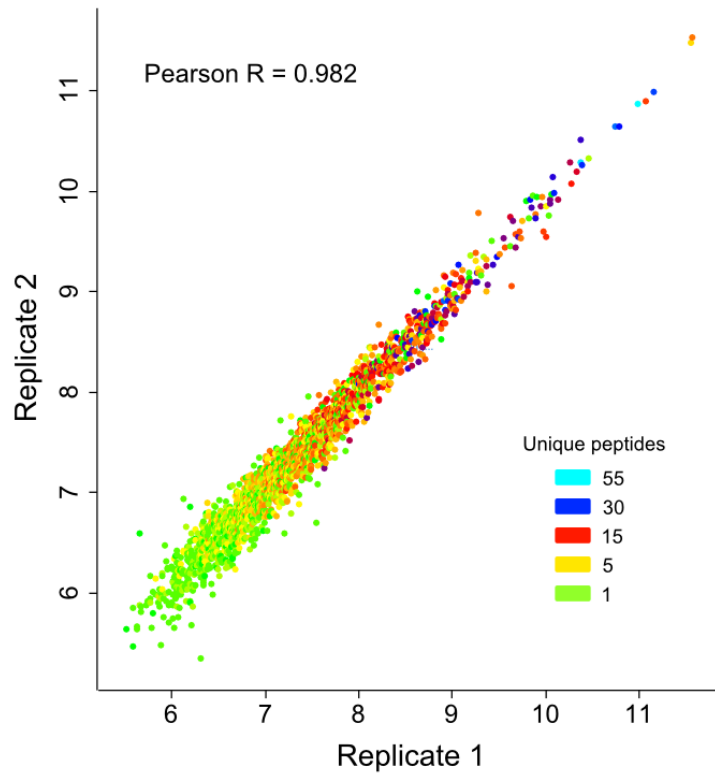

**Figure S2:** Quality of protein quantification. The figure shows the pairwise reproducibility of label-free quantification (LFQ) between the two replicates (Pearson correlation  $R=0.982$ ). Proteins quantified in only one replicate were omitted from further analysis and are not shown in this figure.

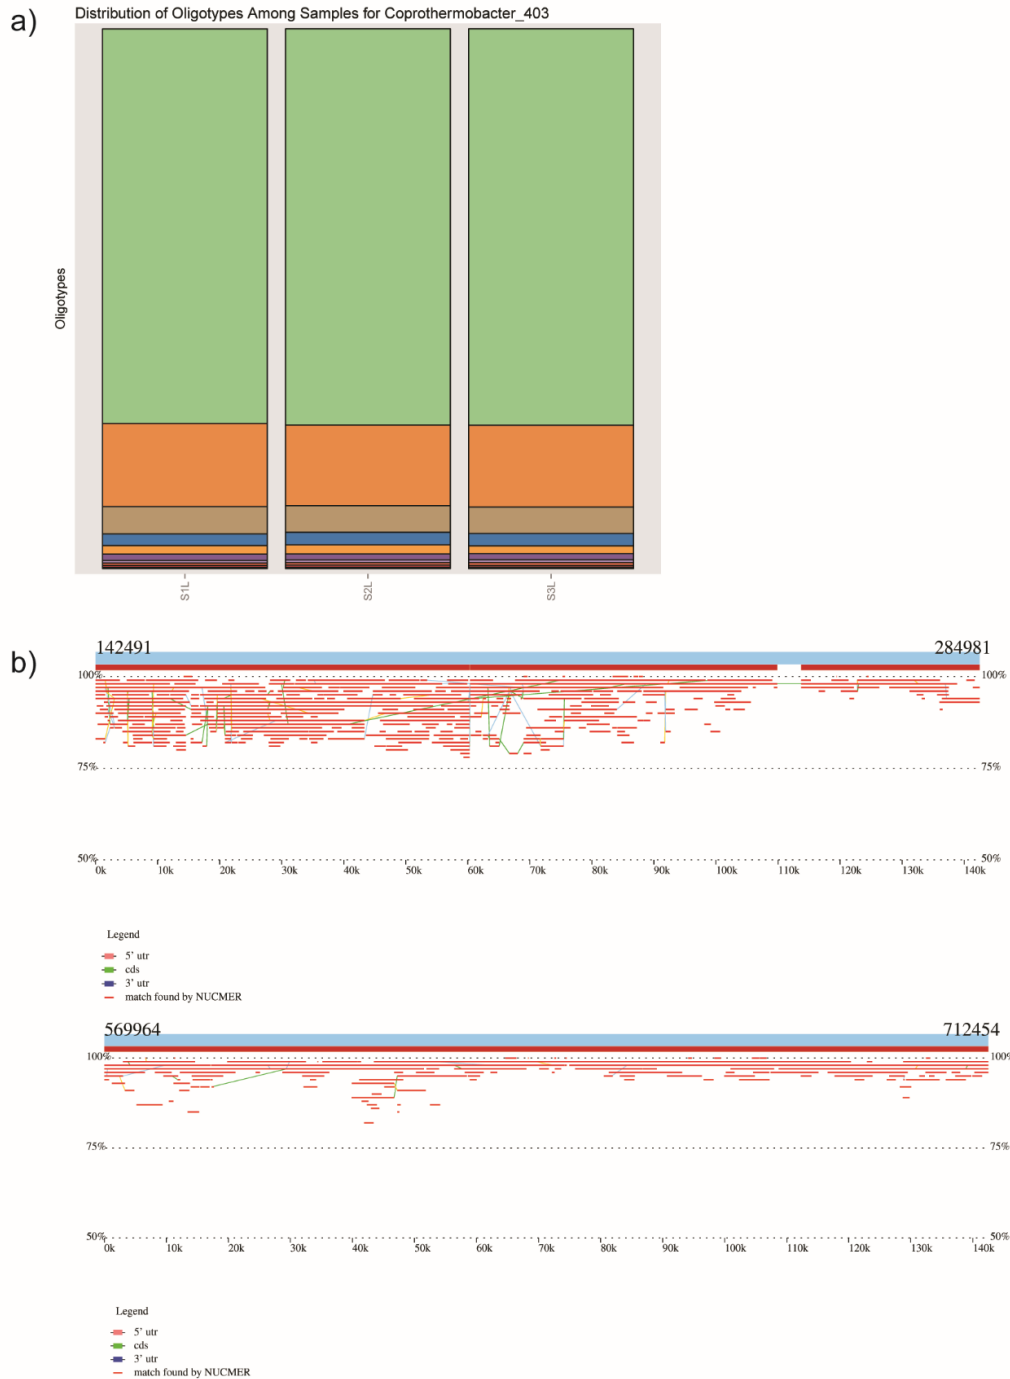

**Figure S3** Indication of several strains of *Coprothermobacter proteolyticus* showed by (a) identification of several oligotypes within OTUs assigned to *Coprothermobacter* in the triplicated (S1L, S2L and S3L) 16S rRNA gene sequence data, and (b) alignment (NUCmer) of the draft genome against the representative sequenced genome, *Coprothermobacter proteolyticus* DSM5256.

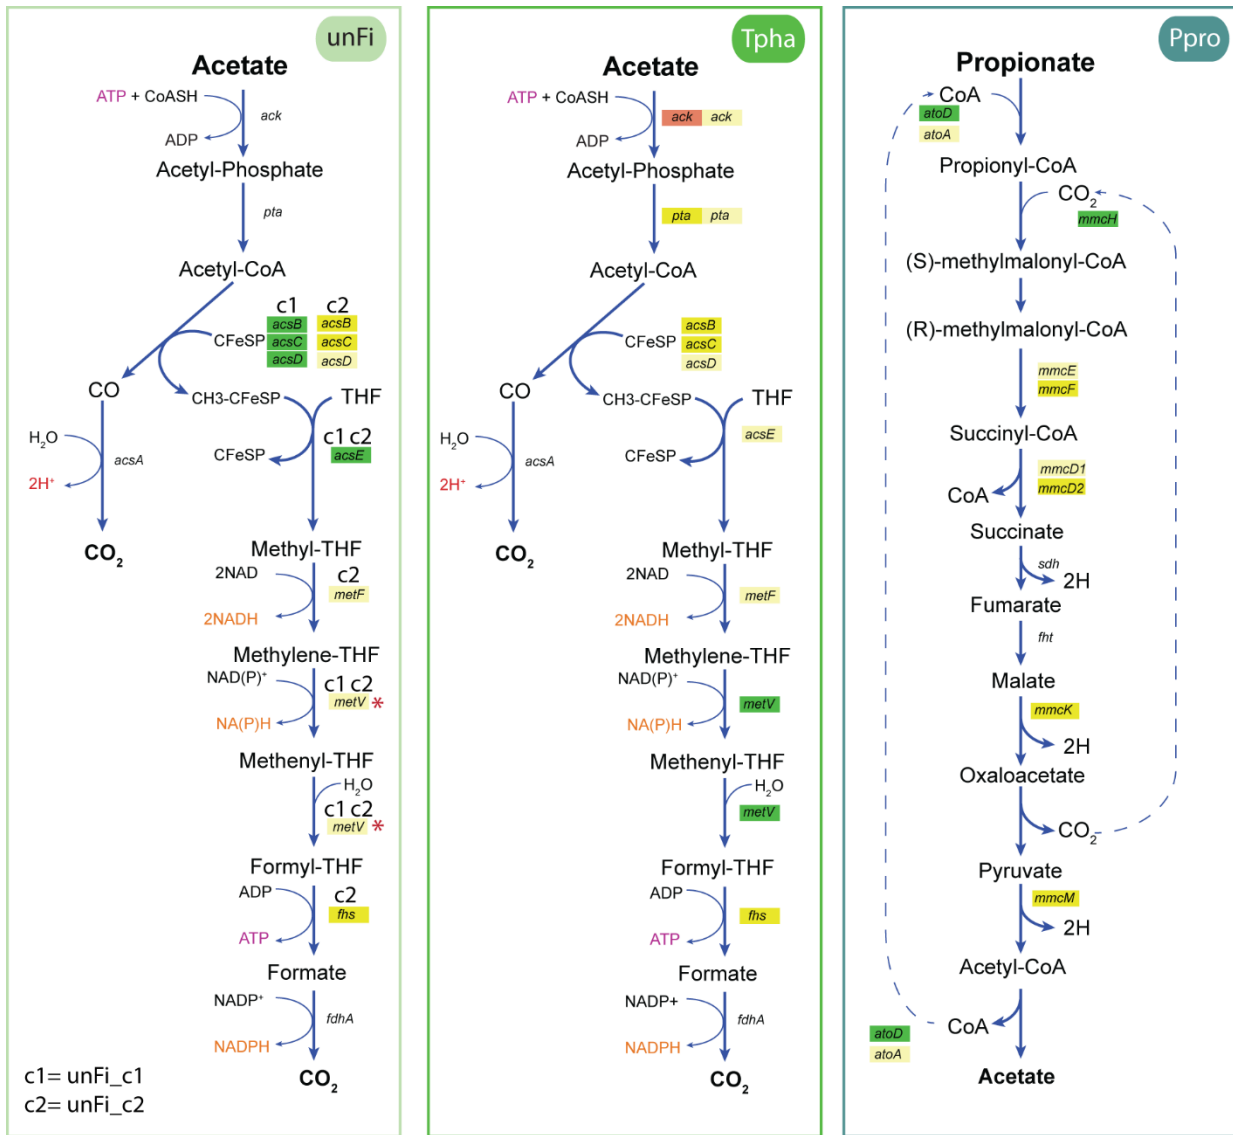

(Figure continues on next page)

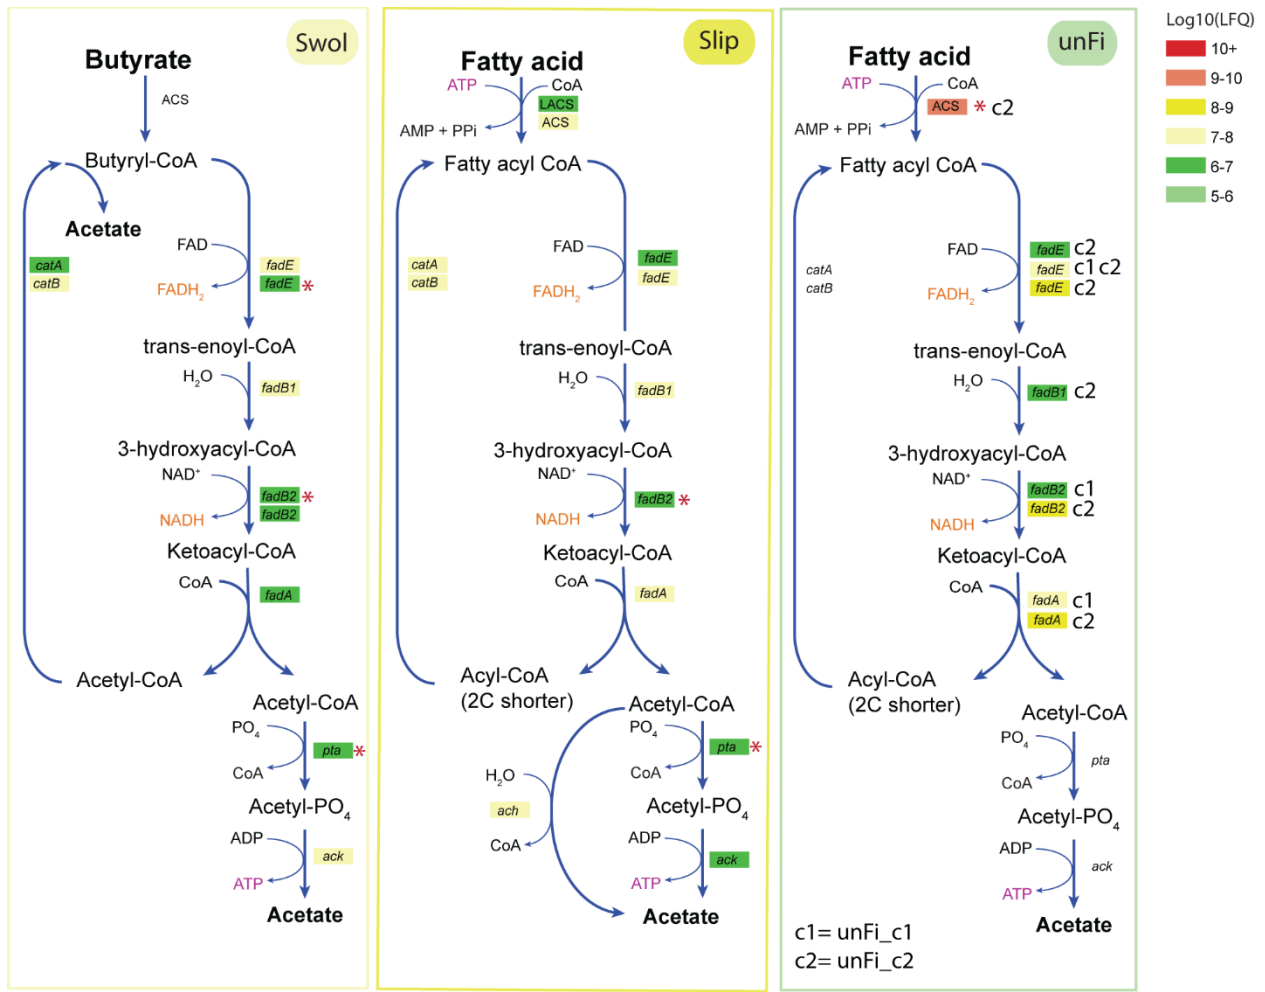

**Figure S4** Hypothetical metabolic pathways for syntrophic oxidation of acetate via Wood Ljungdahl pathway (Tpha; *Thermacetogenium phaeum* cluster 1, and unFi; unFirm02\_FrBGR cluster 1 and 2, as indicated), propionate via methylmalonyl-CoA pathway (Ppro; *Pelotomaculum thermopropionicum*) and butyrate and longer chain fatty acids via  $\beta$ -oxidation (Slip; *Syntrophothermus* spp, Swol; *Syntrophomonas wolfei* cluster 1 and unFi; unFirm02\_FrBGR (cluster 1 and 2, as indicated). The pathways are proposed based on genome and proteome comparison, and protein abundances are indicated by color ranging from high abundant (red) to low abundant (green). Protein abbreviations used in this figure are given in supplementary Table S3. Instances where proteomics could not differentiate which organism the protein originated from are marked with an asterisk (\*).

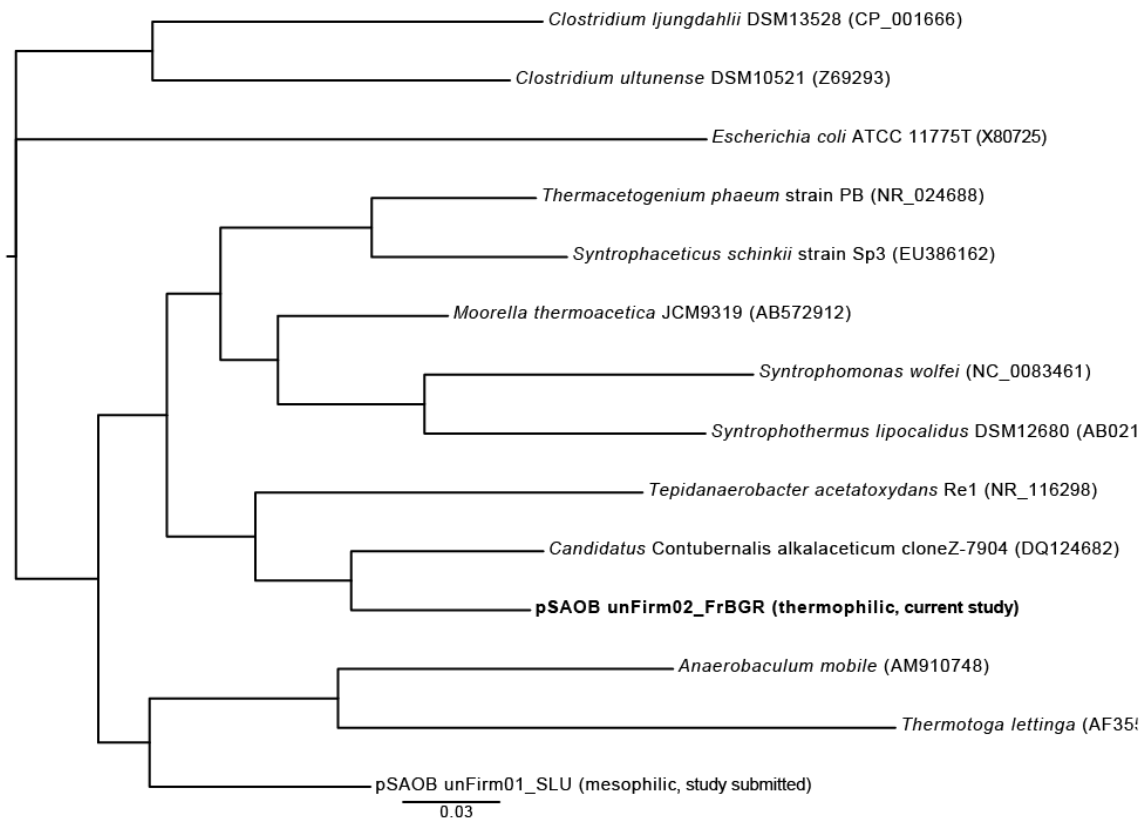

**Figure S5** Phylogenetic tree based on 16S rRNA gene sequences highlighting the relationship of the putative novel SAOB unFirm02\_FrBGR relative to known SAOBs, selected acetogens and one other potential novel SAOB recently assembled from a similar study of a mesophilic digester (*study submitted*). *Anaerobaculum mobile* and *Escherichia coli* was included as outgroups. The 16S rRNA-based alignment was carried out using MUSCLE, and the phylogenetic tree was generated with FastTree.

## Supplementary Tables

**Table S1.** List of reference genomes included in the protein mapping and the interpretation of the results. The reference genomes is only used if specified in the text, otherwise FrBGR genome bins were used.

| Genomes                                                      | Accession number |
|--------------------------------------------------------------|------------------|
| <i>Methanosaeta thermophila</i> PT                           | CP000477.1       |
| <i>Methanothermobacter thermautotrophicus</i> strain Delta H | NC_000916.1      |
| <i>Dictyoglomus thermophilum</i> H-6-12                      | NC_011297        |
| <i>Pelotomaculum thermopropionicum</i> SI                    | NC_009454        |
| <i>Tepidanaerobacter acetatoxydans</i> Re1                   | NC_019954        |
| <i>Clostridium stercorarium</i> subsp. stercorarium DSM 8532 | NC_020134        |

**Table S2.** Sequencing statistics (yields after quality filtration as described in Materials and Methods)

|                            | MiSeq 16S rRNA<br>(n=3, high quality) | MiSeq<br>Metagenomics<br>(Q > 30) | 8 SMRT cells Pac<br>Bio RS (min.<br>accuracy 99.0 %) |
|----------------------------|---------------------------------------|-----------------------------------|------------------------------------------------------|
| Reads (bp)                 | 616 687                               | 54 025 934                        | 217 815                                              |
| Average read length        | 300 PE                                | 300 PE                            | 1 253                                                |
| Sequence information (Mb)  | 180                                   | 16 200                            | 274                                                  |
| Contigs after assembly (n) | -                                     | 235 738                           |                                                      |
| Average contig size (nt)   | -                                     | 2009                              |                                                      |
